# Supplementary material
Source: HighWire-hosted journal article supplement (https://erj.ersjournals.com/content/56/5/1902157)
Supplement: inline-supplementary-material-1 [file inline-supplementary-material-1.pdf]

## **Title**

Pulmonary arterial hypertension associated with primary Sjögren's syndrome: a multi-centre cohort study from China

## **Authors and affiliations**

Jieying Wang, MD; Mengtao Li, MD; Xiao Zhang, MD; Junyan Qian, MD; Qian Wang, MD<sup>1</sup>; Jiuliang Zhao, MD; Zhuang Tian, MD; Wei Wei, MD; Xiaoxia Zuo, MD; Miaojia Zhang, MD; Ping Zhu, MD; Shuang Ye, MD; Wei Zhang, MD; Yi Zheng, MD; Wufang Qi, MD; Yang Li, MD; Zhuoli Zhang, MD; Feng Ding, MD; Jieruo Gu, MD; Yi Liu, MD; Yanhong Wang, PhD; Yan Zhao, MD and Xiaofeng Zeng, MD.

## **Online Data Supplement**

**Supplementary Table 1.** Baseline data comparison between patients included in follow-up risk assessment and those not included.

|                                       | Risk assessment<br>included<br>n=62 | Risk assessment not<br>included<br>n=41 | <i>P</i>         |
|---------------------------------------|-------------------------------------|-----------------------------------------|------------------|
| Gender (F/M)                          | 61/1                                | 39/2                                    | 0.566            |
| Age at recruitment, yr                | 38.8±9.1                            | 49.5±14.5                               | <b>&lt;0.001</b> |
| PAH duration, mth                     | 12.0[6.0, 29.0]                     | 12.5[2.8, 45.9]                         | 0.789            |
| pSS duration, mth                     | 46.0[12.7, 96.7]                    | 46.6[14.2, 110.3]                       | 0.677            |
| Onset interval of pSS and<br>PAH, mth | 0.0[0.0, 55.2]                      | 2.1[0.0, 105.6]                         | 0.743            |
| ESSDAI, score                         | 3.7±4.3                             | 9.7±7.5                                 | <b>&lt;0.001</b> |
| SSDDI, score                          | 2.0±1.3                             | 2.3±1.6                                 | 0.217            |
| WHO Fc I-II                           | 34(54.8%)                           | 25(60.5%)                               | 0.567            |
| 6MWD, m                               | 418.0±105.6                         | 372.9±83.4                              | 0.071            |
| BNP, ng/L                             | 239[106, 501]                       | 275[77, 643]                            | 0.854            |
| NT-proBNP, pg/ml                      | 846[292, 2114]                      | 810[329, 2070]                          | 0.957            |
| <b>RHC</b>                            |                                     |                                         |                  |
| mPAP, mmHg                            | 49.5±9.4                            | 46.0±12.0                               | 0.102            |
| PAWP, mmHg                            | 8.0±3.0                             | 9.3±2.6                                 | <b>0.050</b>     |
| PVR, WU                               | 11.6±5.1                            | 11.3±5.8                                | 0.795            |
| CI, L/min/m <sup>2</sup>              | 2.5±0.7                             | 2.6±1.0                                 | 0.542            |
| RAP, mmHg                             | 6.6±4.8                             | 6.6±4.3                                 | 0.972            |
| <b>TTE</b>                            |                                     |                                         |                  |
| PASP, mmHg                            | 83.7±17.9                           | 74.8±22.1                               | <b>0.027</b>     |
| LVEF, %                               | 68.2±7.1                            | 67.2±5.9                                | 0.478            |
| Pericardial effusion, no              | 16(27.1%)                           | 21(51.2%)                               | <b>0.014</b>     |
| <b>Treatment regimen</b>              |                                     |                                         |                  |
| Glucocorticoids, no                   | 56(90.3%)                           | 35(85.4%)                               | 0.276            |
| Immunosuppressant, no                 | 54(87.1%)                           | 35(85.4%)                               | 0.365            |
| Target therapy for PAH,<br>no         | 58(93.5%)                           | 33(80.5%)                               | 0.191            |
| ≥2                                    | 11(17.7%)                           | 5(12.3%)                                | 0.391            |
| Binary therapy <sup>a</sup>           | 57(91.9%)                           | 27(65.1%)                               | <b>0.001</b>     |

ESSDAI=EULAR primary Sjogren's syndrome disease activity index. SSDDI = Sjogren's syndrome disease damage index, WHO Fc = WHO functional class, 6MWD = 6 minutes walking distance, BNP = brain natriuretic peptide, NT-proBNP = N-terminal pro-brain natriuretic peptide, RHC = right heart catheterization, mPAP = mean pulmonary arterial pressure, PAWP = pulmonary arterial wedge pressure, PVR = pulmonary vascular resistance, CI = cardiac index, RAP=right atrial pressure, TTE=transthoracic echocardiography, PASP = pulmonary arterial systolic pressure, LVEF=left ventricle ejection fraction.

<sup>a</sup> combination of immunosuppressant and PAH target therapy.
